# Supplementary material for: A worldwide meta-analysis (1977–2020) of sediment core dating using fallout radionuclides including 137 Cs and 210 Pb xs
Source: Copernicus journal article supplement (doi:10.5194/essd-2021-168), 2021-06-30
Supplement: Supplementary file [file essd-2021-168-AC1-supplement.pdf]

We would like to thank the anonymous referee for his/her careful review of the manuscript and for providing these comments and suggestions to which we respond in detail below.

| Reviewer's comment                                                                                                                                                                                                                                                                                                                                                                                                                                                                                                                                                                                                                                                                                                                                                                                                                                                                                                                                                | Reply                                                                                                                                                                                                                                                                                                                                                                                                                                                                                                                                                                                                                                                                                                                                                                                                                                                                                                                                                                                                                                                                                                                                                                                                                                                                                                                            |
|-------------------------------------------------------------------------------------------------------------------------------------------------------------------------------------------------------------------------------------------------------------------------------------------------------------------------------------------------------------------------------------------------------------------------------------------------------------------------------------------------------------------------------------------------------------------------------------------------------------------------------------------------------------------------------------------------------------------------------------------------------------------------------------------------------------------------------------------------------------------------------------------------------------------------------------------------------------------|----------------------------------------------------------------------------------------------------------------------------------------------------------------------------------------------------------------------------------------------------------------------------------------------------------------------------------------------------------------------------------------------------------------------------------------------------------------------------------------------------------------------------------------------------------------------------------------------------------------------------------------------------------------------------------------------------------------------------------------------------------------------------------------------------------------------------------------------------------------------------------------------------------------------------------------------------------------------------------------------------------------------------------------------------------------------------------------------------------------------------------------------------------------------------------------------------------------------------------------------------------------------------------------------------------------------------------|
| <p>Based on the compilation of 573 articles published between 1977 and 2020, reporting the collection of 1351 individual dating sediment cores, this review documents the occurrence of three main sources of <math>^{137}\text{Cs}</math> that are the most widely detected in sediment cores (the thermonuclear bomb testing peak in 1963, the Chernobyl accident in 1986, the Fukushima accident in 2011), as well as 24 additional local releases of <math>^{137}\text{Cs}</math>. The correct attribution of these sources may improve the chronology of surface sediment. Furthermore, this review also highlights the low proportion in the Southern Hemisphere, compared to what has been published for the Northern Hemisphere, and outlines the necessity to use additional tools (e.g., <math>^{240}\text{Pu}/^{239}\text{Pu}</math> isotopic ratios) to provide an unambiguous distinction between potential sources and avoid any dating errors.</p> | <p>We are grateful to the reviewer for providing this overall positive comment outlining the extensive amount of work required to compile the data on 1351 sediment cores from 573 articles published between 1977 and 2020.</p>                                                                                                                                                                                                                                                                                                                                                                                                                                                                                                                                                                                                                                                                                                                                                                                                                                                                                                                                                                                                                                                                                                 |
| <p>While this worldwide meta-analysis of <math>^{137}\text{Cs}</math> will be of interest to those studying of dating surface sediment cores in Environmental and Earth sciences, this review represents fairly superficial and does not present significantly new ideas. Two major flaws, to be illustrated further below, exist in the current version: 1. More articles using <math>^{137}\text{Cs}</math> for dating surface sediment cores should be included in this review. 2. The potential influence of Chernobyl accident, Chinese Nuclear Tests and Fukushima accident is highly overestimated. For these and other reasons, listed below, I do not recommend publication in the prestigious journal of Earth System Science Data.</p>                                                                                                                                                                                                                 | <p>We take this opportunity to respond that, although we fully respect the reviewers' opinion, we disagree with this statement. Of note, we think that the reviewer considers a 'review article' in <i>Earth System Science Data</i> as that in any other Earth Science journal. Of note, as detailed online in the journal guidelines (<a href="https://www.earth-system-science-data.net/about/manuscript_types.html">https://www.earth-system-science-data.net/about/manuscript_types.html</a>), ESSD manuscripts describe original research data, databases, or combined datasets derived from them. Review articles evaluate in particular the relative merits of datasets, databases, or data collections. Therefore, we disagree with the opinion that our review remains 'superficial' as it sticks to the journal originality in that it "evaluates the relative merits of datasets".</p> <p>Regarding specific remark (1), we had to limit somehow the selection of articles covered by the review through the application of reproducible criteria (i.e. "Journal articles using <math>^{137}\text{Cs}</math> for dating sediment cores published in English language were extracted from the Thomson Reuters Web of Science database until 29 February 2020. The search words "<math>^{137}\text{Cs}</math>" and</p> |

|                                                                                                                                                                                                                                                                                                                                                                                                                                                                                                                                                                                                                                                                                                                                                                                                                                                                                                                                                                                                                                                                                                         |                                                                                                                                                                                                                                                                                                                                                                                                                                                                                                                                                                                                                                                                                                                                                                                                                                                                                                                                                                                                                                                                                                                                                                                              |
|---------------------------------------------------------------------------------------------------------------------------------------------------------------------------------------------------------------------------------------------------------------------------------------------------------------------------------------------------------------------------------------------------------------------------------------------------------------------------------------------------------------------------------------------------------------------------------------------------------------------------------------------------------------------------------------------------------------------------------------------------------------------------------------------------------------------------------------------------------------------------------------------------------------------------------------------------------------------------------------------------------------------------------------------------------------------------------------------------------|----------------------------------------------------------------------------------------------------------------------------------------------------------------------------------------------------------------------------------------------------------------------------------------------------------------------------------------------------------------------------------------------------------------------------------------------------------------------------------------------------------------------------------------------------------------------------------------------------------------------------------------------------------------------------------------------------------------------------------------------------------------------------------------------------------------------------------------------------------------------------------------------------------------------------------------------------------------------------------------------------------------------------------------------------------------------------------------------------------------------------------------------------------------------------------------------|
|                                                                                                                                                                                                                                                                                                                                                                                                                                                                                                                                                                                                                                                                                                                                                                                                                                                                                                                                                                                                                                                                                                         | <p>“sediment core” were used in combination.” (L.86-88)</p> <p>Regarding specific remark (2), we fully agree with the reviewers’ diagnosis, although we cannot change the conclusions made by the authors in their original publications. We hope to have the opportunity to clarify this when revising the manuscript, as we do think that it fully fits to the journal guideline that ESSD review papers should “evaluate the relative merits of datasets”.</p>                                                                                                                                                                                                                                                                                                                                                                                                                                                                                                                                                                                                                                                                                                                            |
| <p>As this manuscript is classified as Review Article, the current content does not justify its publication in Earth System Science Data. Although the search words of “<sup>137</sup>Cs” and “sediment core” were used in Web of Science (WOS) and a total of 573 articles (or 910 publications) were found, a large number of studies for paleoclimate which was established the chronology based on <sup>137</sup>Cs, have not been included in this review. For example, Lake Suga (Wu et al., 2010, EST, doi: 10.1021/es9029649), Lake Bosten (Liao et al., 2014, EST, doi: 10.1021/es405364m), Lake Sayram (Lan et al., 2019, Science China, doi:10.1007/s11430-018-9240-x), ... in northwestern China (as cited by Lan et al., 2020, QSR, doi: 10.1016/j.quascirev.2020.106413). Well, I believe this review is also not a comprehensive study in other regions. So, this review manuscript is not sufficient for the worldwide meta-analysis of <sup>137</sup>Cs and I suggest the search word of this study in WOS includes the paleoclimate or paleoenvironment as well as late Holocene.</p> | <p>We thank the reviewer for drawing our attention to these articles. Of note, the articles of Wu et al. (2010), EST and Liao et al. (2014) are <i>already</i> covered by our review (see the references listed on L. 1460 and L. 2070). The article by Lan et al. (2020) was accepted in June 2020 (i.e. after the end date of the period covered by the current review until 29 February 2020). However, we propose to include it if we have the opportunity to revise the manuscript given the relevance of the topic for the current review.</p> <p>Regarding the publication of Lan et al. (2019), it was not included because it was not identified through the WoS search (as authors do not outline ‘<sup>137</sup>Cs’ as an important feature or keyword). As for other paleoclimate studies, by definition, they target very long timescales (several thousands of years) and most often do not detail the procedures using <sup>137</sup>Cs/<sup>210</sup>Pb (only detected in the uppermost part of very long archives) to date them. Accordingly, we do think that including these paleoclimatic studies would provide very limited added value to the current compilation.</p> |
| <p>The potential influence of Chernobyl accident, Chinese Nuclear Tests (CNT) and Fukushima accident is highly overestimated in this manuscript. Based on the potential influence of radioactivity transport from the Chernobyl accident and Chinese Nuclear Tests, and the comparison with deposition records of 26 European lake sediments and 5 Alpine ice cores, Lan et al (2020, QSR, doi: 10.1016/j.quascirev.2020.106413) propose that the <sup>137</sup>Cs fallout maximum of lake sediments in NW China and central Asia is primarily attributable to the global atmospheric thermonuclear weapon tests in 1963-1964 and that there is no unambiguous evidence to</p>                                                                                                                                                                                                                                                                                                                                                                                                                          | <p>We agree with the referee's comment. The detection of fallout associated with Chernobyl or the Chinese tests is overestimated. Nevertheless, these results come from the conclusions made by the authors in their original studies, and the purpose of the current ESSD review is to evaluate the merits of these independent datasets. Accordingly, based on this data compilation, we discuss the reasons for these discrepancies, as in sections 4.1 and 4.2 (wrong attribution of <sup>137</sup>Cs peaks, remobilization processes of this radionuclide (e.g. soil erosion, bioturbation)).</p>                                                                                                                                                                                                                                                                                                                                                                                                                                                                                                                                                                                       |

|                                                                                                                                                                                                                                                                                                                                                                                                                                                                                                                                                                                                                                                                                                                                                                                                                                                                                                                        |                                                                                                                                                                                                                                                                                                                                                                                                                                                                                                                                                           |
|------------------------------------------------------------------------------------------------------------------------------------------------------------------------------------------------------------------------------------------------------------------------------------------------------------------------------------------------------------------------------------------------------------------------------------------------------------------------------------------------------------------------------------------------------------------------------------------------------------------------------------------------------------------------------------------------------------------------------------------------------------------------------------------------------------------------------------------------------------------------------------------------------------------------|-----------------------------------------------------------------------------------------------------------------------------------------------------------------------------------------------------------------------------------------------------------------------------------------------------------------------------------------------------------------------------------------------------------------------------------------------------------------------------------------------------------------------------------------------------------|
| <p>confirm the Chernobyl- and CNT-derived <math>^{137}\text{Cs}</math> local-fallout subpeaks. The evidence of references at Line 315-327, which is associated with Chernobyl- and CNT-derived <math>^{137}\text{Cs}</math>, is insufficient. Accordingly, <math>^{137}\text{Cs}</math> of lake sediments in southern and eastern China should also cannot record the Chernobyl- and CNT-derived <math>^{137}\text{Cs}</math> local-fallout subpeaks. As suggested by authors, <math>^{240}\text{Pu}/^{239}\text{Pu}</math> ratios should be a good candidate to achieve this type of discrimination. Frankly, Wu et al (2010, EST, doi: 10.1021/es9029649) and Liao et al (2014, EST, doi:10.1021/es405364m) have conducted the <math>^{240}\text{Pu}/^{239}\text{Pu}</math> ratios in lake sediments of northern China and have a similar idea with Lan et al (2020, QSR, doi: 10.1016/j.quascirev.2020.106413).</p> | <p>As mentioned in our review and highlighted by the referee, we suggest the use of other tracers to improve the attribution of <math>^{137}\text{Cs}</math> peaks in regions of the world where their identification is sometimes complex. We agree again with the referee as we clearly state this in the text (e.g. L. 332-334). Of note, Wu et al. (2010) and Liao et al. (2014) are already cited in the current manuscript, and we propose to add that – more recent – of Lan et al. (2020) if we are given the opportunity to revise our work.</p> |
| <p>Furthermore, as suggested by authors, the attribution of <math>^{137}\text{Cs}</math> peaks to Chernobyl and Fukushima in Mexico and Ghana should be taken with great caution in view of the observations made in this manuscript (Fig. 4c).</p>                                                                                                                                                                                                                                                                                                                                                                                                                                                                                                                                                                                                                                                                    | <p>Again, we fully agree with the referee's comment. This review helps to highlight erroneous fallout source attributions. The interest of our study is to highlight these potential errors, discuss them and make recommendations for future studies. This is what we do, for example, on the issues outlined by the referee on LL. 369-376.</p>                                                                                                                                                                                                         |
| <p>Specific comments/suggestions:<br/>Line 2: <math>^{210}\text{Pb}_{\text{xs}}</math> in Title should change to <math>^{210}\text{Pb}</math>.</p>                                                                                                                                                                                                                                                                                                                                                                                                                                                                                                                                                                                                                                                                                                                                                                     | <p>To avoid any potential confusion between the use of excess <math>^{210}\text{Pb}</math> (<math>^{210}\text{Pb}_{\text{xs}}</math>) and that of total <math>^{210}\text{Pb}</math>, we propose to keep the <math>^{210}\text{Pb}_{\text{xs}}</math> notation in the title.</p>                                                                                                                                                                                                                                                                          |
| <p>Line 20-21: the others information need not shown in Abstract.</p>                                                                                                                                                                                                                                                                                                                                                                                                                                                                                                                                                                                                                                                                                                                                                                                                                                                  | <p>This information will be removed from the abstract as suggested by the reviewer.</p>                                                                                                                                                                                                                                                                                                                                                                                                                                                                   |
| <p>Line 49-50: this sentence should be cited more representative references.</p>                                                                                                                                                                                                                                                                                                                                                                                                                                                                                                                                                                                                                                                                                                                                                                                                                                       | <p>We agree with the referee, we propose to cite earlier articles on radionuclide dating with <math>^{210}\text{Pb}_{\text{xs}}</math> in the revised version (e.g. Appleby and Oldfield, 1978).</p>                                                                                                                                                                                                                                                                                                                                                      |
| <p>Line 110-111: should explain how to corrected to 1 Jan 2020.</p>                                                                                                                                                                                                                                                                                                                                                                                                                                                                                                                                                                                                                                                                                                                                                                                                                                                    | <p>The decay-correction method will be further detailed in the revised version of the manuscript.</p>                                                                                                                                                                                                                                                                                                                                                                                                                                                     |
| <p>Line 193-196: Fig. 4 does not show the average activity.</p>                                                                                                                                                                                                                                                                                                                                                                                                                                                                                                                                                                                                                                                                                                                                                                                                                                                        | <p>Agreed. Reference to Figure 4 will be removed here.</p>                                                                                                                                                                                                                                                                                                                                                                                                                                                                                                |
| <p>Line 203: as suggested as aforementioned, the Chernobyl sign in China is incorrect.</p>                                                                                                                                                                                                                                                                                                                                                                                                                                                                                                                                                                                                                                                                                                                                                                                                                             | <p>Again, we fully agree with the reviewer. This is why we state in the text that <i>“Surprisingly, a peak of radiocaesium was also attributed to this accident in cores from China (n=17)”</i>, although we cannot change the conclusions made in the original study.</p>                                                                                                                                                                                                                                                                                |
| <p>Line 246-248: check this sentence.</p>                                                                                                                                                                                                                                                                                                                                                                                                                                                                                                                                                                                                                                                                                                                                                                                                                                                                              | <p>This sentence will be rephrased to clarify it.</p>                                                                                                                                                                                                                                                                                                                                                                                                                                                                                                     |

|                                                                                                                |                                                                                                                                      |
|----------------------------------------------------------------------------------------------------------------|--------------------------------------------------------------------------------------------------------------------------------------|
| Line 280: the $^{240}\text{Pu}/^{239}\text{Pu}$ ratio is much better than Plutonium.                           | Agreed (we specified this in the text on L. 281 for instance), although we can also specify it here.                                 |
| Line 316-327: rewrite this paragraph. Yunnan Province is located in southwestern China not southeastern China. | Thanks for catching this, our apologies for creating this confusion. This part of the text will be thoroughly checked and rewritten. |
